# Supplementary material
Source: PubMed Central journal article supplement (PMC4336227)
Supplement: NIHMS650907-supplement-Supplemental_Digital_Content.pdf [file NIHMS650907-supplement-Supplemental_Digital_Content.pdf]

Supplemental Digital Content Figure 1. Healthcare Utilization Rates by Hepatitis Serostatus.

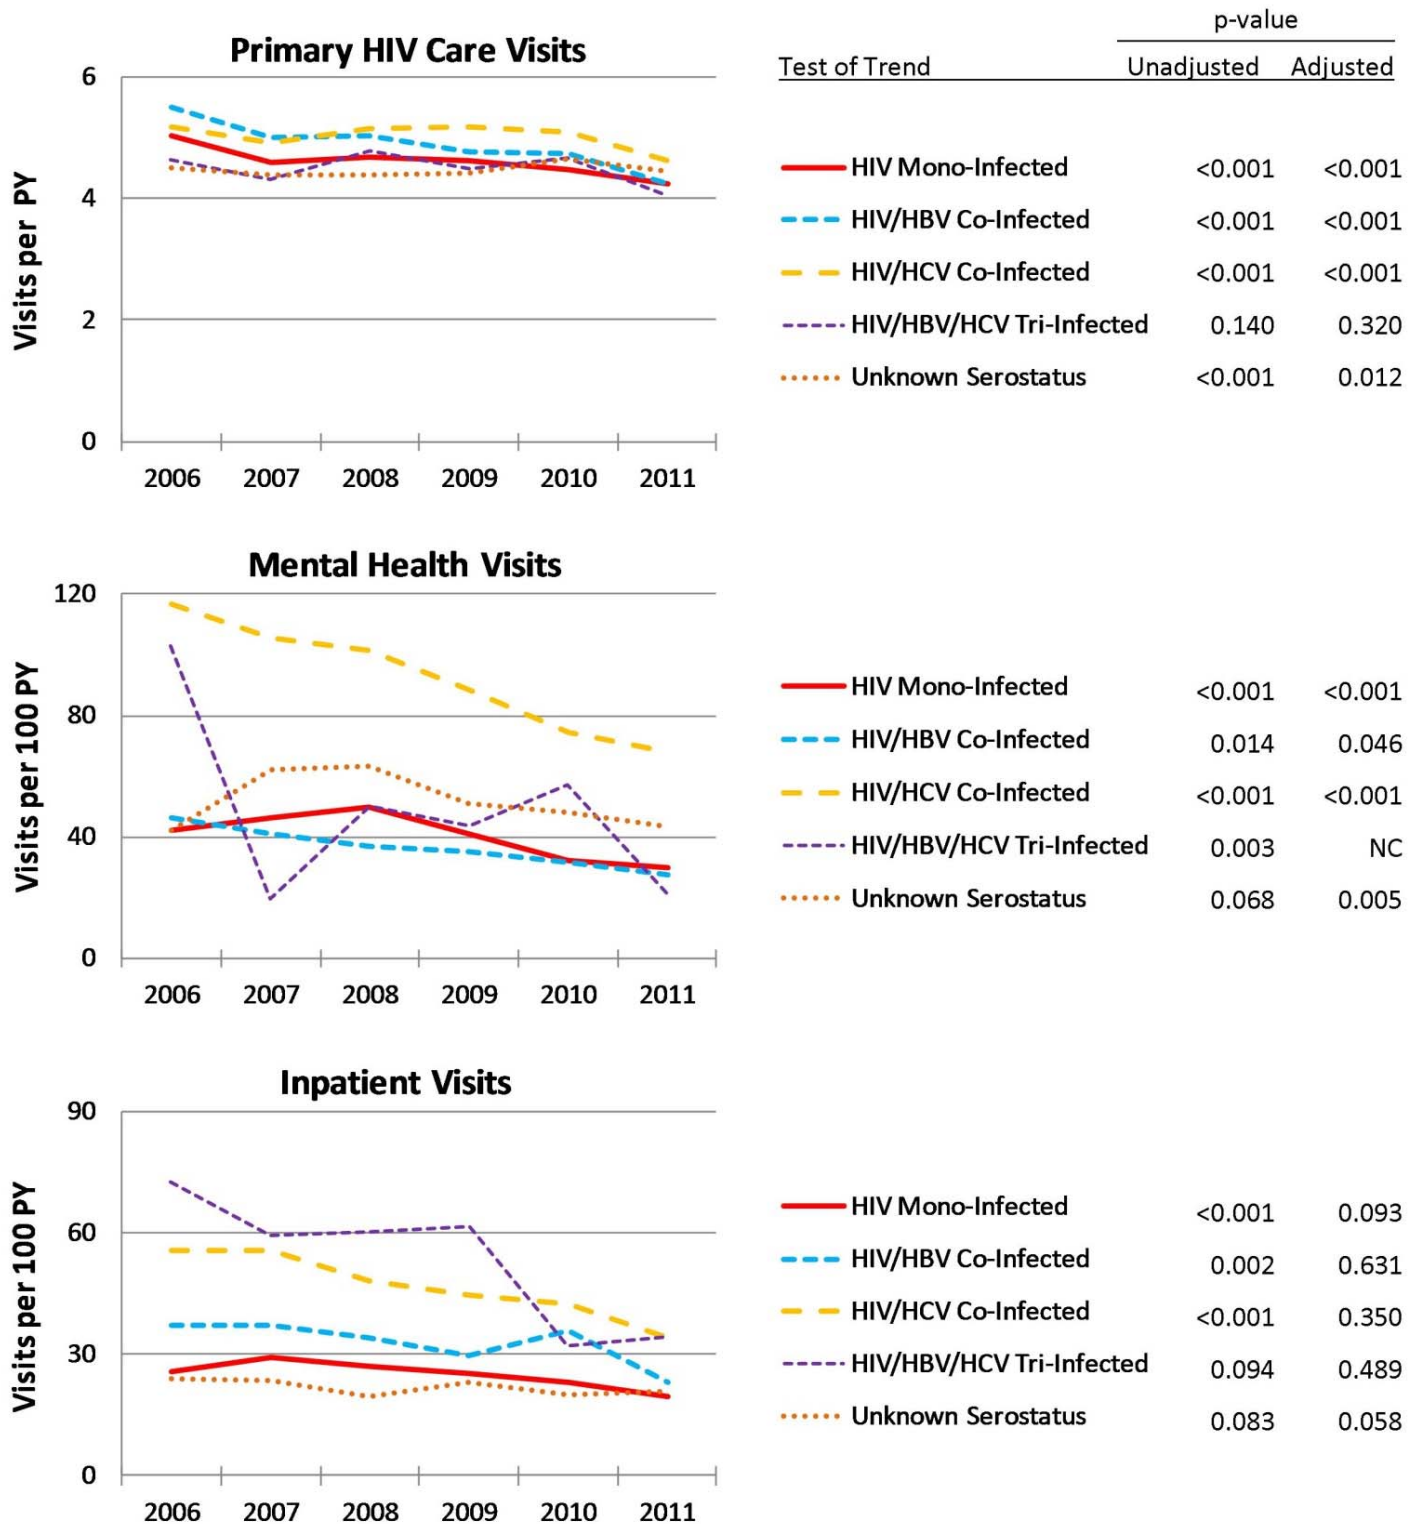

Rates are standardized as hospitalizations per person-year of follow-up for primary HIV care visits and per 100 person-years of follow-up for mental health and inpatient visits. Tests of trend were performed using negative binomial regression with categorical calendar year indicators to detect differences in utilization between start of study in 2006 and end of study in 2011. "NC" indicates that model was non-convergent due to the small number of events in the HIV/HBV/HCV tri-infected group.

**Supplemental Digital Content Table 1.** Healthcare Utilization Rates by Hepatitis Serostatus.

| Hepatitis Serostatus                 | Utilization Rate (Standard Error) |                         |                         |                        |                        |                        |                        |
|--------------------------------------|-----------------------------------|-------------------------|-------------------------|------------------------|------------------------|------------------------|------------------------|
|                                      | 2006                              | 2007                    | 2008                    | 2009                   | 2010                   | 2011                   | Overall                |
| <b>HIV Primary Care (Visits/PY)</b>  |                                   |                         |                         |                        |                        |                        |                        |
| HIV mono-infection                   | 5.03 (0.06)<br>[4500]             | 4.60 (0.06)<br>[4612]   | 4.69 (0.05)<br>[5038]   | 4.63 (0.05)<br>[5435]  | 4.48 (0.05)<br>[5956]  | 4.23 (0.05)<br>[6010]  | 4.59 (0.03)<br>[9146]  |
| HIV/HBV co-infection                 | 5.51 (0.30)<br>[235]              | 4.99 (0.26)<br>[292]    | 5.02 (0.24)<br>[323]    | 4.76 (0.23)<br>[346]   | 4.74 (0.22)<br>[388]   | 4.23 (0.20)<br>[385]   | 4.82 (0.12)<br>[636]   |
| HIV/HCV co-infection                 | 5.18 (0.13)<br>[1110]             | 4.90 (0.12)<br>[1251]   | 5.14 (0.11)<br>[1380]   | 5.18 (0.11)<br>[1468]  | 5.10 (0.11)<br>[1512]  | 4.63 (0.10)<br>[1430]  | 5.02 (0.06)<br>[2445]  |
| HIV/HBV/HCV tri-infection            | 4.63 (0.36)<br>[66]               | 4.32 (0.33)<br>[77]     | 4.79 (0.33)<br>[85]     | 4.48 (0.32)<br>[84]    | 4.68 (0.32)<br>[88]    | 4.06 (0.30)<br>[80]    | 4.49 (0.23)<br>[150]   |
| Unknown serostatus                   | 4.50 (0.08)<br>[2000]             | 4.39 (0.09)<br>[1740]   | 4.37 (0.10)<br>[1540]   | 4.43 (0.10)<br>[1464]  | 4.66 (0.10)<br>[1704]  | 4.45 (0.09)<br>[2110]  | 4.47 (0.05)<br>[4074]  |
| <b>Mental Health (Visits/100 PY)</b> |                                   |                         |                         |                        |                        |                        |                        |
| HIV mono-infection                   | 42.15 (2.53)<br>[4500]            | 46.26 (2.61)<br>[4612]  | 50.04 (2.61)<br>[5038]  | 40.72 (2.27)<br>[5435] | 32.33 (1.93)<br>[5956] | 29.76 (1.82)<br>[6010] | 39.51 (1.60)<br>[9146] |
| HIV/HBV co-infection                 | 46.36 (9.53)<br>[235]             | 41.11 (8.10)<br>[292]   | 36.82 (7.22)<br>[323]   | 35.29 (6.83)<br>[346]  | 31.40 (6.13)<br>[388]  | 27.26 (5.61)<br>[385]  | 35.33 (5.58)<br>[636]  |
| HIV/HCV co-infection                 | 116.74 (9.43)<br>[1110]           | 105.33 (8.39)<br>[1251] | 101.56 (7.89)<br>[1380] | 88.22 (7.07)<br>[1468] | 74.36 (6.36)<br>[1512] | 67.72 (6.19)<br>[1430] | 90.57 (4.46)<br>[2445] |
| HIV/HBV/HCV tri-infection            | 102.9 (26.78)<br>[66]             | 19.34 (10.76)<br>[77]   | 50.20 (16.52)<br>[85]   | 43.52 (15.53)<br>[84]  | 57.26 (17.20)<br>[88]  | 21.49 (10.85)<br>[80]  | 47.7 (12.76)<br>[150]  |
| Unknown serostatus                   | 42.29 (5.85)<br>[2000]            | 61.96 (7.78)<br>[1740]  | 63.26 (8.20)<br>[1540]  | 51.21 (7.59)<br>[1464] | 48.31 (7.00)<br>[1704] | 43.63 (6.14)<br>[2110] | 51.16 (2.96)<br>[4074] |
| <b>Inpatient (Visits/100 PY)</b>     |                                   |                         |                         |                        |                        |                        |                        |
| HIV mono-infection                   | 25.53 (1.54)<br>[4500]            | 29.34 (1.63)<br>[4612]  | 26.86 (1.50)<br>[5038]  | 25.49 (1.40)<br>[5435] | 22.94 (1.27)<br>[5956] | 19.76 (1.16)<br>[6010] | 24.69 (0.80)<br>[9146] |
| HIV/HBV co-infection                 | 37.09 (7.86)<br>[235]             | 37.34 (7.11)<br>[292]   | 34.14 (6.41)<br>[323]   | 29.67 (5.77)<br>[346]  | 35.93 (6.04)<br>[388]  | 22.90 (4.74)<br>[385]  | 32.25 (3.58)<br>[636]  |
| HIV/HCV co-infection                 | 55.46 (4.16)<br>[1110]            | 55.76 (3.91)<br>[1251]  | 48.09 (3.48)<br>[1380]  | 44.65 (3.22)<br>[1468] | 42.58 (3.08)<br>[1512] | 34.11 (2.81)<br>[1430] | 46.08 (2.01)<br>[2445] |
| HIV/HBV/HCV tri-infection            | 72.36 (19.20)<br>[66]             | 59.41 (16.12)<br>[77]   | 60.24 (15.47)<br>[85]   | 61.44 (15.78)<br>[84]  | 32.21 (11.03)<br>[88]  | 34.13 (11.69)<br>[80]  | 52.27 (8.43)<br>[150]  |
| Unknown serostatus                   | 24.17 (2.42)<br>[2000]            | 23.36 (2.61)<br>[1740]  | 19.69 (2.50)<br>[1540]  | 22.96 (2.78)<br>[1464] | 20.10 (2.47)<br>[1704] | 20.90 (2.32)<br>[2110] | 21.94 (1.26)<br>[4074] |

Mean utilization rate was calculated by dividing the aggregate number of visits by the aggregate person-time for each hepatitis serostatus and year combination. These rates were multiplied by 100 for mental health and inpatient visits. Poisson regression was used to estimate standard errors of the mean, modeling utilization rate as a function of time, stratified by hepatitis serostatus. Standard errors were scaled using square root of Pearson chi-squared-based dispersion.

**Supplemental Digital Content Table 2.** Percentage of Patients Utilizing Healthcare Services, by Hepatitis Serostatus.

**(A) Mental Health**

| Hepatitis Serostatus      | Percentage of Patients With At Least 1 Mental Health Visit<br>(95% Confidence Interval) |                     |                     |                     |                     |                     |                     |
|---------------------------|-----------------------------------------------------------------------------------------|---------------------|---------------------|---------------------|---------------------|---------------------|---------------------|
|                           | 2006                                                                                    | 2007                | 2008                | 2009                | 2010                | 2011                | Ever                |
| HIV mono-infection        | 12.4<br>(11.5-13.4)                                                                     | 12.6<br>(11.6-13.5) | 13.7<br>(12.7-14.6) | 12.7<br>(11.8-13.5) | 11.1<br>(10.3-11.9) | 10.7<br>(9.9-11.5)  | 21.2<br>(20.3-22.0) |
| HIV/HBV co-infection      | 12.3<br>(8.1-16.6)                                                                      | 13.0<br>(9.1-16.9)  | 13.9<br>(10.1-17.7) | 13.0<br>(9.4-16.6)  | 10.8<br>(7.7-13.9)  | 11.9<br>(8.7-15.2)  | 21.2<br>(18.0-24.4) |
| HIV/HCV co-infection      | 23.8<br>(21.3-26.3)                                                                     | 24.1<br>(21.7-26.4) | 25.7<br>(23.4-28.0) | 23.4<br>(21.2-25.5) | 20.6<br>(18.6-22.7) | 20.3<br>(18.3-22.4) | 34.9<br>(33.0-36.8) |
| HIV/HBV/HCV tri-infection | 22.7<br>(12.5-32.9)                                                                     | 13.0<br>(5.4-20.6)  | 22.4<br>(13.4-31.3) | 16.7<br>(8.6-24.7)  | 15.9<br>(8.2-23.6)  | 12.5<br>(5.2-19.8)  | 30.7<br>(23.2-38.1) |
| Unknown serostatus        | 13.8<br>(12.2-15.2)                                                                     | 14.2<br>(12.6-15.9) | 14.7<br>(13.0-16.5) | 14.2<br>(12.4-16.0) | 13.1<br>(11.5-14.8) | 12.2<br>(10.8-13.6) | 18.3<br>(17.1-19.5) |

**(B) Inpatient**

| Hepatitis Serostatus      | Percentage of Patients With At Least 1 Inpatient Visit<br>(95% Confidence Interval) |                     |                     |                     |                     |                     |                     |
|---------------------------|-------------------------------------------------------------------------------------|---------------------|---------------------|---------------------|---------------------|---------------------|---------------------|
|                           | 2006                                                                                | 2007                | 2008                | 2009                | 2010                | 2011                | Ever                |
| HIV mono-infection        | 13.5<br>(12.5-14.5)                                                                 | 15.0<br>(13.9-16.0) | 14.1<br>(13.2-15.1) | 13.8<br>(12.9-14.7) | 12.7<br>(11.9-13.6) | 11.1<br>(10.3-11.8) | 31.6<br>(30.6-32.5) |
| HIV/HBV co-infection      | 20.8<br>(15.6-26.0)                                                                 | 17.5<br>(13.1-21.8) | 18.6<br>(14.3-22.8) | 15.3<br>(11.5-19.1) | 18.8<br>(14.9-22.7) | 14.3<br>(10.8-17.8) | 37.7<br>(34.0-41.5) |
| HIV/HCV co-infection      | 25.5<br>(22.9-28.1)                                                                 | 28.4<br>(25.9-30.9) | 25.4<br>(23.1-27.7) | 22.3<br>(20.2-24.5) | 22.0<br>(19.9-24.0) | 18.2<br>(16.2-20.2) | 46.2<br>(44.2-48.2) |
| HIV/HBV/HCV tri-infection | 28.8<br>(17.8-39.8)                                                                 | 29.9<br>(19.6-40.2) | 25.9<br>(18.8-38.3) | 28.6<br>(18.8-38.3) | 22.7<br>(13.9-31.6) | 18.8<br>(10.1-27.4) | 49.3<br>(41.2-57.4) |
| Unknown serostatus        | 14.4<br>(12.9-16.0)                                                                 | 12.7<br>(11.1-14.3) | 11.7<br>(10.1-13.3) | 11.9<br>(10.2-13.5) | 11.0<br>(9.5-12.4)  | 11.2<br>(9.8-12.5)  | 24.6<br>(23.3-25.9) |

All study participants had at least one HIV primary care visit during each year of observation. For each hepatitis serostatus group, annual percentages were calculated by dividing the number of participants with at least one visit by the total number of participants categorized into that hepatitis serostatus group during the calendar year. For each hepatitis serostatus group, percentage of patients ever utilizing each healthcare service was calculated by dividing the number of participants with at least one visit while contributing person-time to that hepatitis serostatus group by the total number of participants ever categorized in that hepatitis serostatus group.
